# Supplementary material for: Hole transport materials mediating hole transfer for high efficiency quantum dot sensitized solar cells
Source: Royal Society of Chemistry journal article supplement (doi:10.1039/d0ta10702f), 2020-12-09
Supplement: d0ta10702f1.pdf [file d0ta10702f1.pdf]

## Supplementary Information (SI)

### **Hole transfer materials mediating hole transfer for high efficiency quantum dot sensitized solar cells**

Yu Lin, Han Song, Jianxin Zhang, Huashang Rao, Zhenxiao Pan,\* and Xinhua Zhong\*

Key Laboratory for Biobased Materials and Energy of Ministry of Education, College of Materials and Energy, South China Agricultural University, Guangzhou 510642, China

Guangdong Laboratory for Lingnan Modern Agriculture, Guangzhou 510642, China

Email: zxpan@scau.edu.cn (for Z. P.)

zhongxh@scau.edu.cn (for X. Z.)

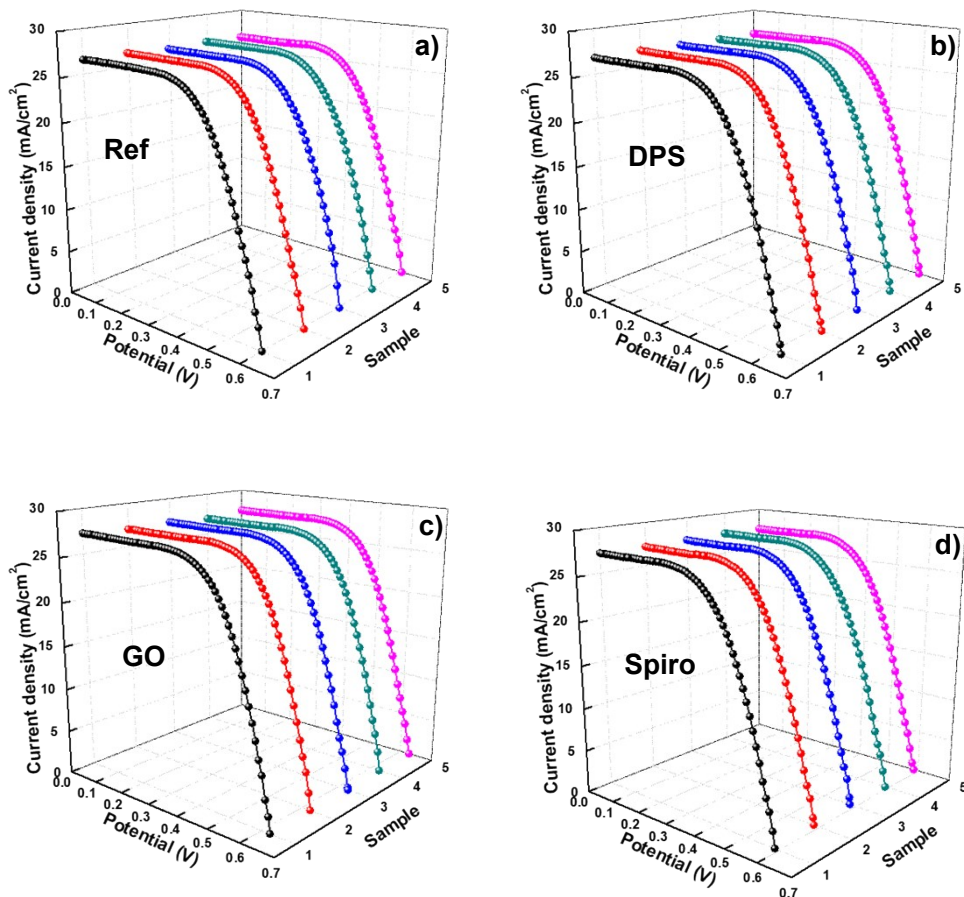

**Fig. S1** *J-V* curves of ZCISE QDSCs based on: (a) reference, (b) DPS, (c) GO, and (d) Spiro-OMeTAD modification.

**Table S1.** Individual and average photovoltaic parameter values of ZCISE QDSCs based on reference, DPS, GO and Spiro modification under standard conditions (AM 1.5 G, 100 mW cm<sup>-2</sup>).

| ZCISE QDSCs  | $V_{oc}$ (V) | $J_{sc}$ (mA/cm <sup>2</sup> ) | FF (%)     | PCE (%)    |
|--------------|--------------|--------------------------------|------------|------------|
| Ref          | 0.601        | 26.61                          | 60.68      | 9.71       |
|              | 0.607        | 26.55                          | 60.25      | 9.71       |
|              | 0.605        | 26.29                          | 60.61      | 9.64       |
|              | 0.605        | 26.52                          | 59.78      | 9.59       |
|              | 0.606        | 26.46                          | 59.87      | 9.60       |
| Average      | 0.605±0.002  | 26.49±0.12                     | 60.24±0.41 | 9.65±0.06  |
| DPS          | 0.623        | 26.78                          | 61.91      | 10.33      |
|              | 0.624        | 26.89                          | 60.79      | 10.20      |
|              | 0.622        | 26.79                          | 61.75      | 10.29      |
|              | 0.623        | 26.85                          | 61.70      | 10.33      |
|              | 0.622        | 26.92                          | 61.37      | 10.28      |
| Average      | 0.623±0.001  | 26.85±0.06                     | 61.50±0.44 | 10.29±0.05 |
| GO           | 0.626        | 27.27                          | 63.48      | 10.84      |
|              | 0.625        | 27.00                          | 64.17      | 10.83      |
|              | 0.631        | 27.13                          | 63.03      | 10.79      |
|              | 0.627        | 26.91                          | 64.01      | 10.80      |
|              | 0.628        | 27.37                          | 62.66      | 10.77      |
| Average      | 0.627±0.002  | 27.14±0.19                     | 63.47±0.64 | 10.81±0.03 |
| Spiro-OMeTAD | 0.587        | 27.23                          | 59.56      | 9.52       |
|              | 0.583        | 27.19                          | 59.17      | 9.38       |
|              | 0.582        | 27.28                          | 59.20      | 9.40       |
|              | 0.589        | 27.46                          | 57.81      | 9.35       |
|              | 0.586        | 27.43                          | 58.29      | 9.37       |
| Average      | 0.585±0.002  | 27.32±0.12                     | 58.80±0.73 | 9.40±0.07  |

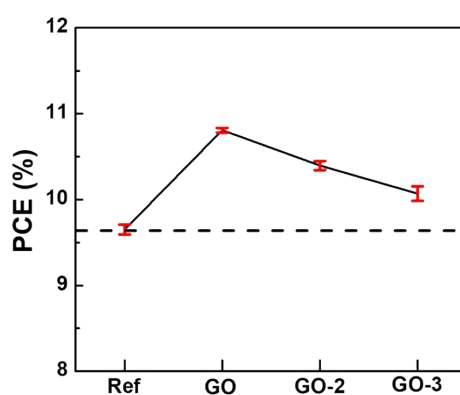

**Fig. S2** PCE parameters of ZCISE-based QDSCs based on different cycles of GO modification strategy.

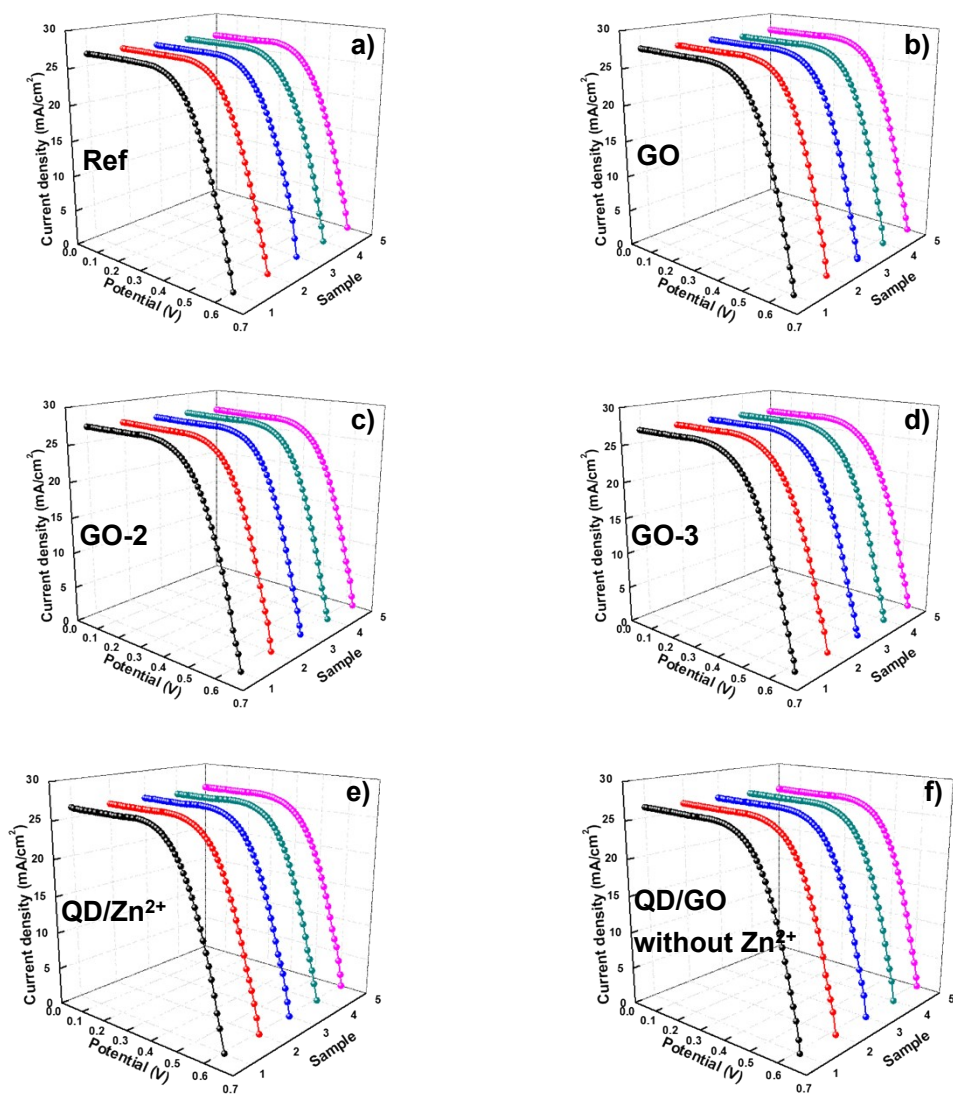

**Fig. S3** *J-V* curves of ZCISE QDSCs based on (a) reference, GO modification for (b) 1 cycle (c) 2 cycles (d) 3 cycles, (e) Zn<sup>2+</sup> treatment without GO modification and (f) GO modification without Zn<sup>2+</sup> treatment.

**Table S2.** Individual and average photovoltaic parameters of ZCISE QDSCs based on different strategy of GO modification and Zn<sup>2+</sup> treatment under standard conditions (AM 1.5 G, 100 mW cm<sup>-2</sup>).

| ZCISE QDSCs                       | $V_{oc}$ (V) | $J_{sc}$ (mA/cm <sup>2</sup> ) | FF (%)     | PCE (%)    |
|-----------------------------------|--------------|--------------------------------|------------|------------|
| Ref                               | 0.601        | 26.61                          | 60.68      | 9.71       |
|                                   | 0.607        | 26.55                          | 60.25      | 9.71       |
|                                   | 0.605        | 26.29                          | 60.61      | 9.64       |
|                                   | 0.605        | 26.52                          | 59.78      | 9.59       |
|                                   | 0.606        | 26.46                          | 59.87      | 9.60       |
| Average                           | 0.605±0.002  | 26.49±0.12                     | 60.24±0.41 | 9.65±0.06  |
| GO                                | 0.626        | 27.27                          | 63.48      | 10.84      |
|                                   | 0.625        | 27.00                          | 64.17      | 10.83      |
|                                   | 0.631        | 27.13                          | 63.03      | 10.79      |
|                                   | 0.627        | 26.91                          | 64.01      | 10.80      |
|                                   | 0.628        | 27.37                          | 62.66      | 10.77      |
| Average                           | 0.627±0.002  | 27.14±0.19                     | 63.47±0.64 | 10.81±0.03 |
| GO-2                              | 0.629        | 27.12                          | 61.34      | 10.47      |
|                                   | 0.620        | 26.95                          | 61.76      | 10.32      |
|                                   | 0.619        | 27.00                          | 62.22      | 10.40      |
|                                   | 0.621        | 26.97                          | 62.10      | 10.40      |
|                                   | 0.625        | 26.82                          | 62.46      | 10.39      |
| Average                           | 0.623±0.004  | 26.97±0.11                     | 61.98±0.44 | 10.40±0.05 |
| GO-3                              | 0.629        | 26.61                          | 60.58      | 10.14      |
|                                   | 0.629        | 26.62                          | 59.36      | 9.94       |
|                                   | 0.630        | 26.63                          | 59.78      | 10.03      |
|                                   | 0.631        | 26.64                          | 60.08      | 10.10      |
|                                   | 0.630        | 26.61                          | 60.49      | 10.14      |
| Average                           | 0.630±0.001  | 26.62±0.01                     | 60.06±0.51 | 10.07±0.09 |
| QD/Zn <sup>2+</sup>               | 0.607        | 26.36                          | 61.35      | 9.81       |
|                                   | 0.610        | 26.03                          | 60.52      | 9.64       |
|                                   | 0.609        | 26.12                          | 61.35      | 9.76       |
|                                   | 0.608        | 26.01                          | 61.91      | 9.79       |
|                                   | 0.605        | 26.34                          | 60.93      | 9.71       |
| Average                           | 0.608±0.002  | 26.17±0.17                     | 61.21±0.52 | 9.74±0.07  |
| QD/GO<br>without Zn <sup>2+</sup> | 0.614        | 26.33                          | 63.70      | 10.30      |
|                                   | 0.621        | 26.07                          | 63.05      | 10.21      |
|                                   | 0.620        | 26.11                          | 63.05      | 10.21      |
|                                   | 0.620        | 26.05                          | 63.11      | 10.20      |
|                                   | 0.614        | 26.05                          | 63.56      | 10.17      |
| Average                           | 0.618±0.003  | 26.12±0.12                     | 63.29±0.31 | 10.22±0.05 |

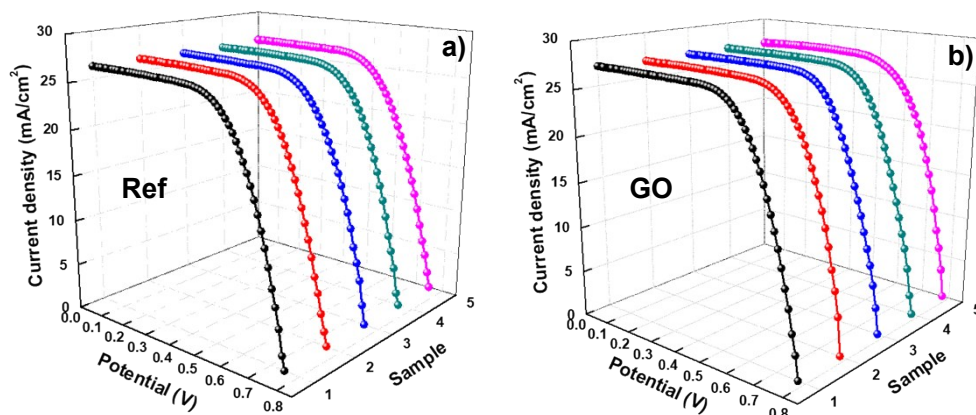

**Fig. S4**  $J$ - $V$  curves of (a) reference and (b) GO modification QDSCs based on N-MC/Ti CE.

**Table S3.** Individual and average photovoltaic parameter values of reference and GO modification QDSCs based on N-MC/Ti CE under standard conditions (AM 1.5 G, 100 mW cm<sup>-2</sup>).

| N-MC/Ti CE | $V_{oc}$ (V) | $J_{sc}$ (mA/cm <sup>2</sup> ) | FF (%)     | PCE (%)    |
|------------|--------------|--------------------------------|------------|------------|
| Ref        | 0.749        | 26.33                          | 64.14      | 12.65      |
|            | 0.747        | 26.36                          | 62.95      | 12.39      |
|            | 0.755        | 26.24                          | 63.10      | 12.50      |
|            | 0.748        | 26.23                          | 64.16      | 12.59      |
|            | 0.751        | 26.49                          | 62.50      | 12.40      |
| Average    | 0.750±0.002  | 26.33±0.08                     | 63.37±0.62 | 12.50±0.08 |
| GO         | 0.775        | 27.06                          | 66.10      | 13.86      |
|            | 0.768        | 26.91                          | 66.87      | 13.82      |
|            | 0.775        | 26.96                          | 66.00      | 13.79      |
|            | 0.777        | 26.97                          | 66.47      | 13.93      |
|            | 0.767        | 27.01                          | 66.61      | 13.80      |
| Average    | 0.772±0.004  | 26.98±0.04                     | 66.41±0.29 | 13.84±0.04 |
